# Supplementary material
Source: MDPI journal article supplement (https://www.mdpi.com/2071-1050/14/24/16348)
Supplement: s1 [file s1]

## Supplementary materials for

# Antibacterial activity of ferulic acid ester against *Ralstonia solanacearum* and its synergy with essential oils

Qing-Bo Tu <sup>1,2</sup>, Hui-Cong Shi <sup>1</sup>, Ping Li <sup>1,3</sup>, Sheng Sheng <sup>1,3</sup>, Fu-An Wu <sup>1,3,\*</sup>

<sup>1</sup> School of Biotechnology, Jiangsu University of Science and Technology, Zhenjiang 212018, China

<sup>2</sup> School of pharmacy, Nanjing University of Chinese Medicine Hanlin College, Taizhou 225300, China

<sup>3</sup> Key Laboratory of Silkworm and Mulberry Genetic Improvement, Ministry of Agricultural and Rural Affairs, Sericultural Research Institute, Chinese Academy of Agricultural Sciences, Zhenjiang 212018, China

\* Correspondence author: fuword@163.com; Tel.: +86-511-85616571

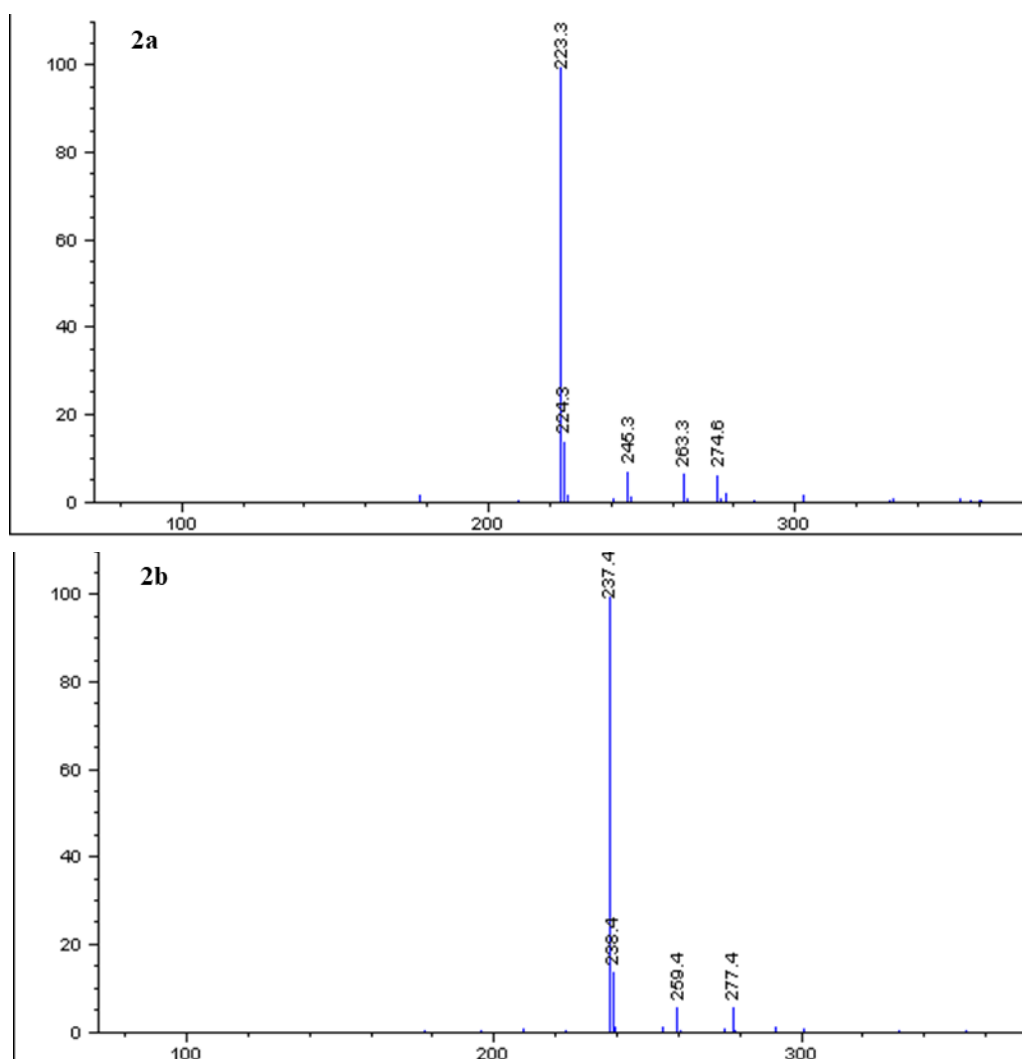

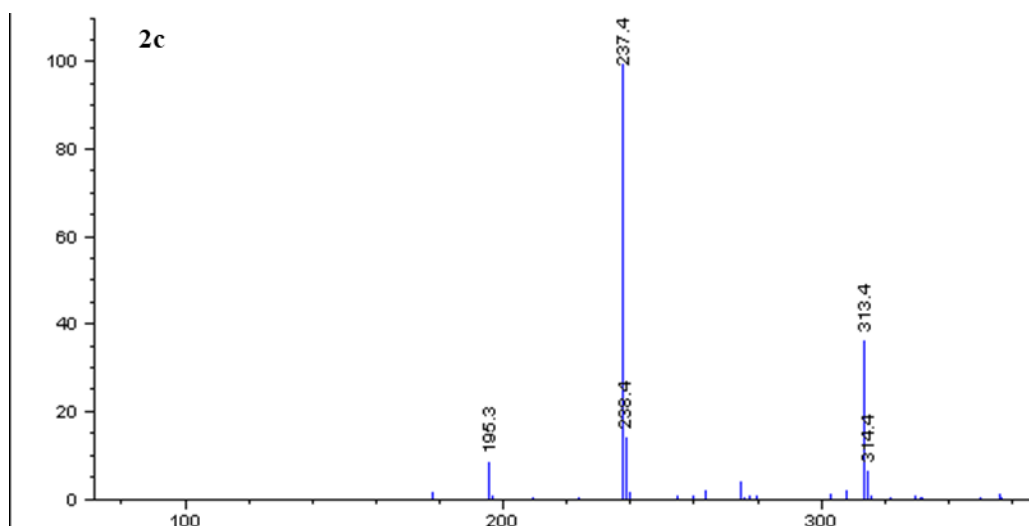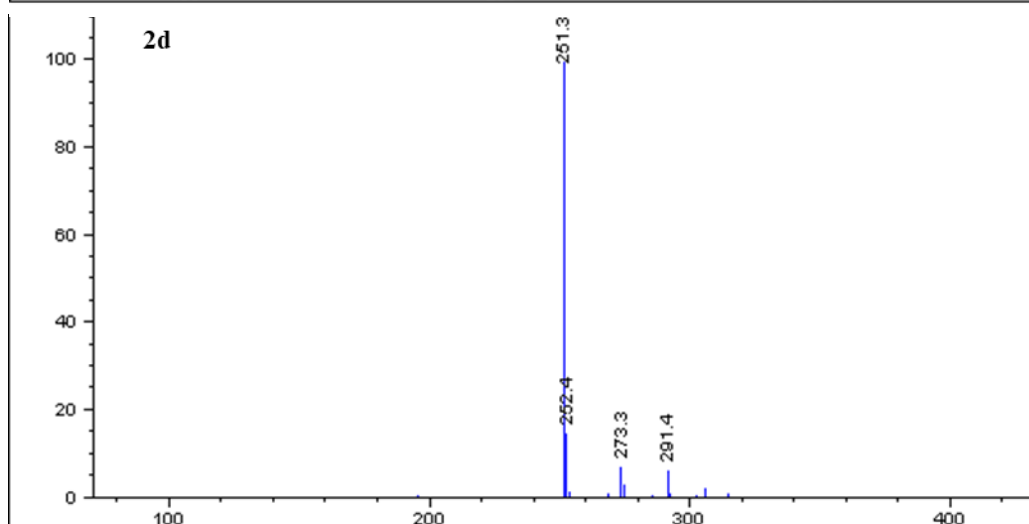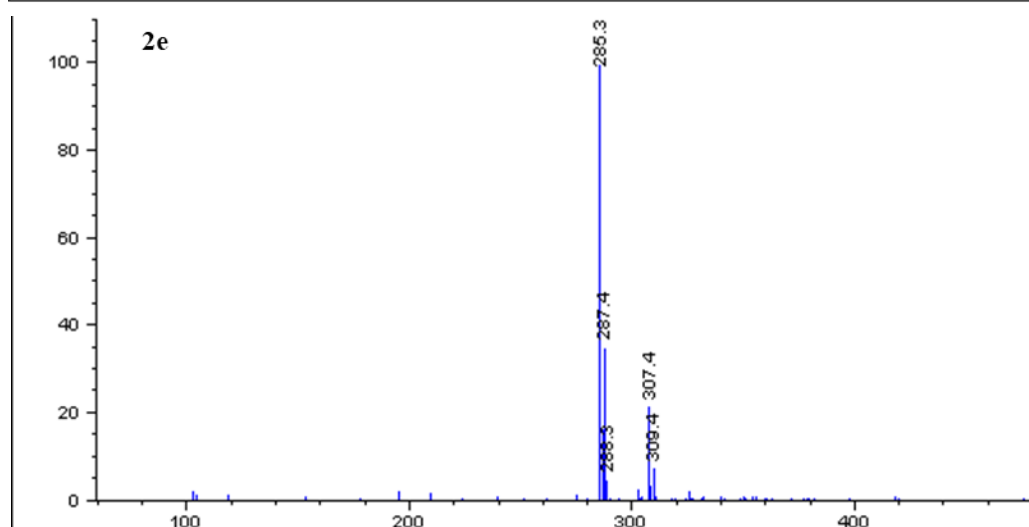

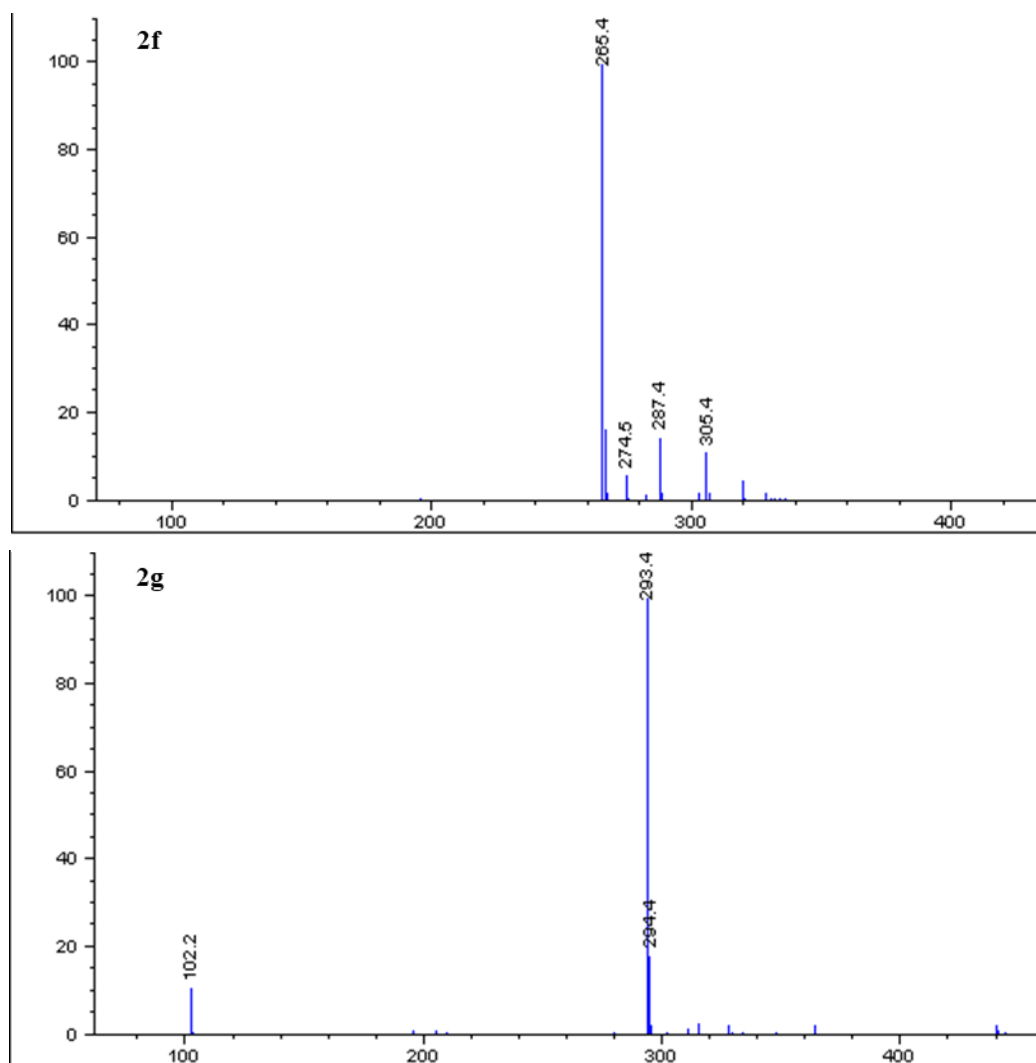

**Figure S1.** ESI-MS analysis of ferulate esters. **2a:** Ethyl ferulate, **2b** Propyl ferulate, **2c:** Isopropyl ferulate, **2d:** Butyl ferulate, **2e:** Chlorobutyl ferulate, **2f:** Amyl ferulate, **2g:** Heptyl ferulate.

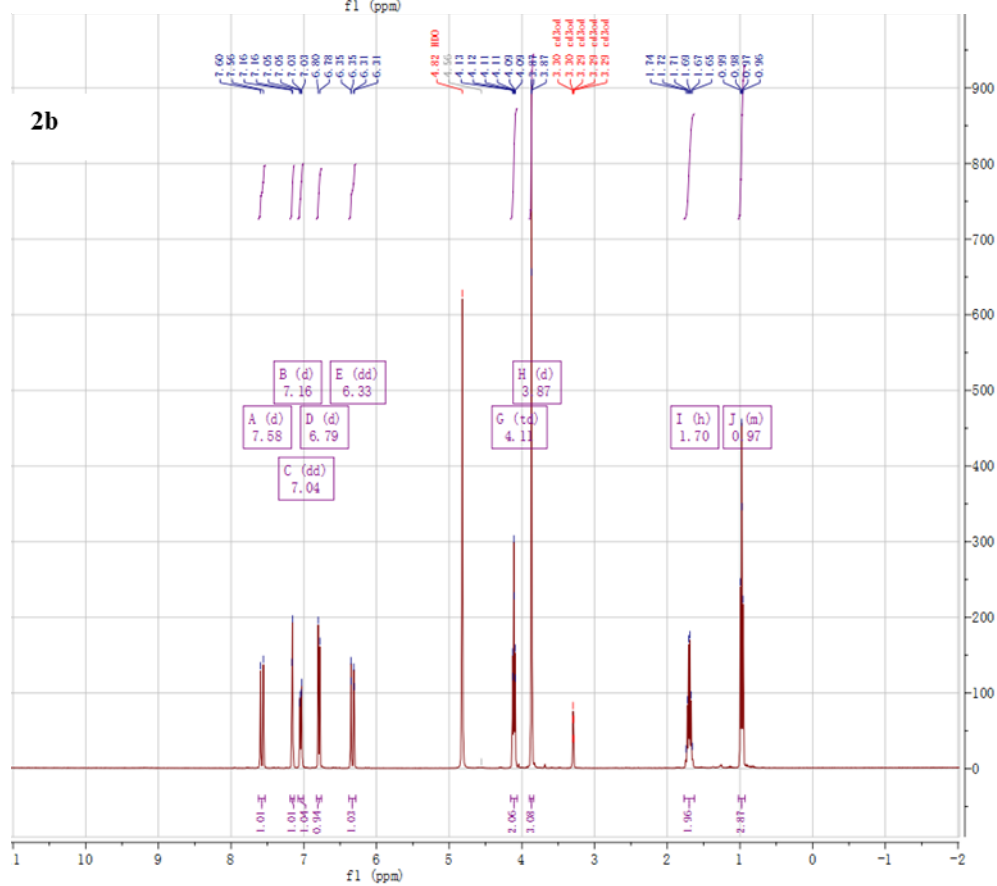

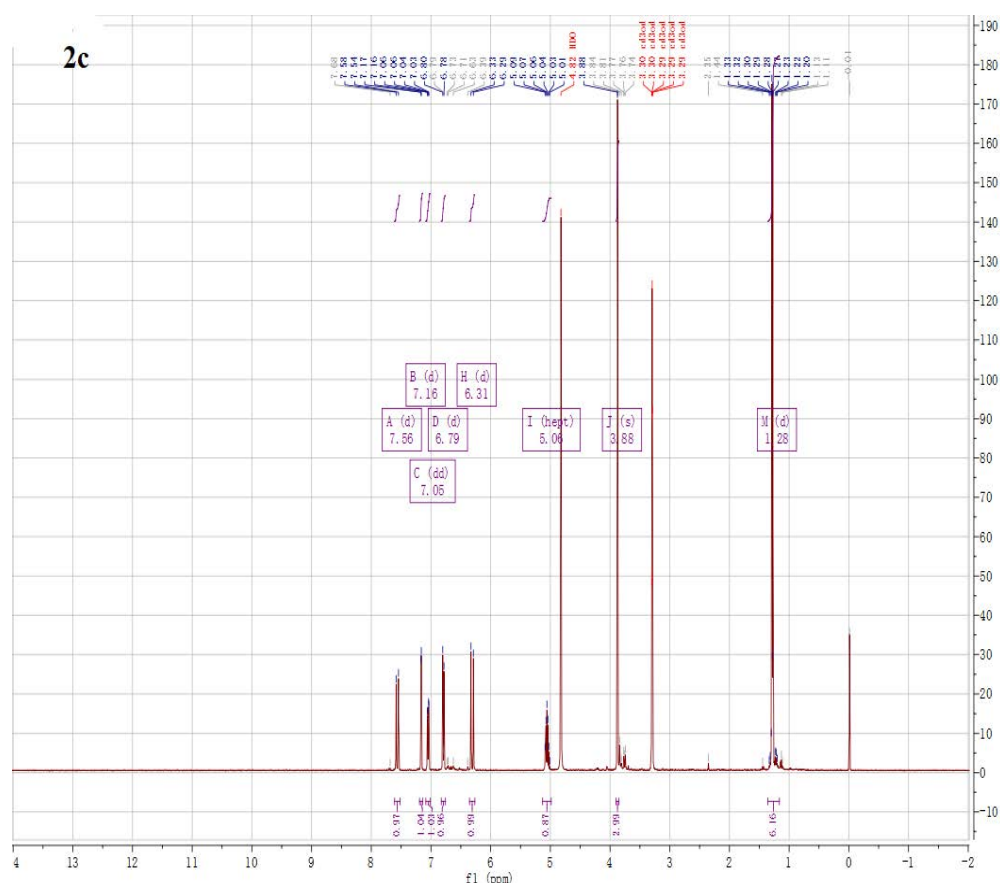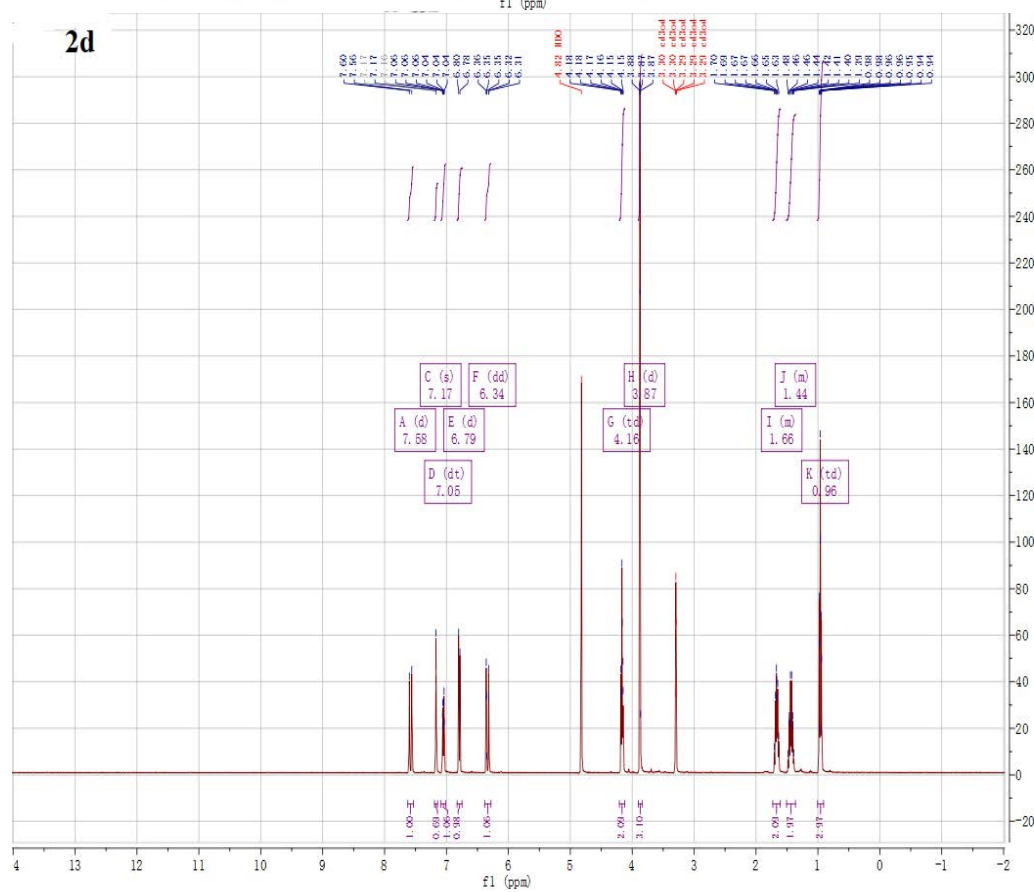

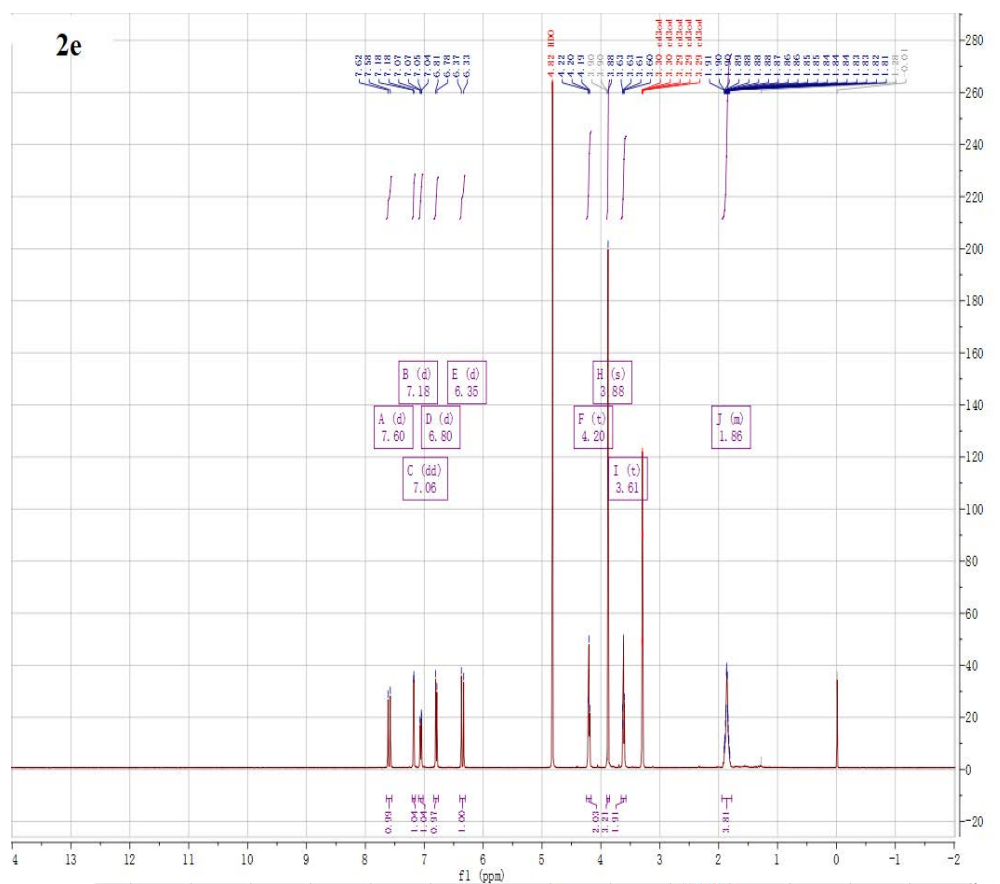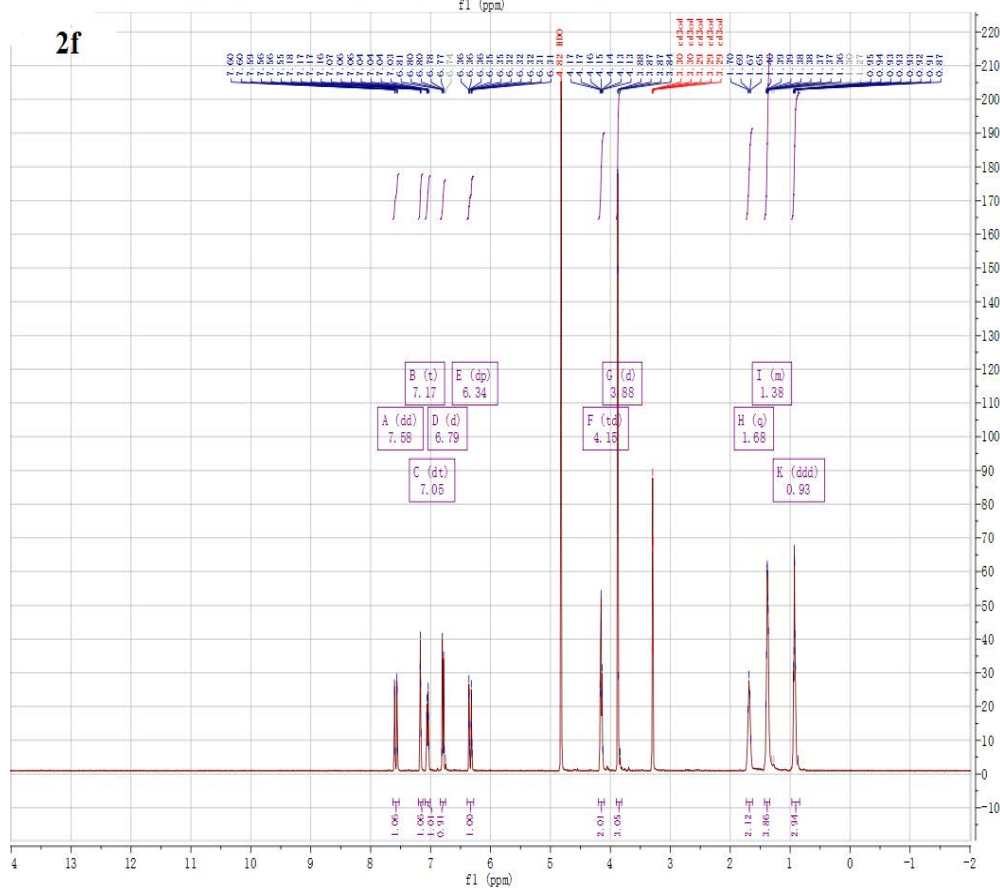

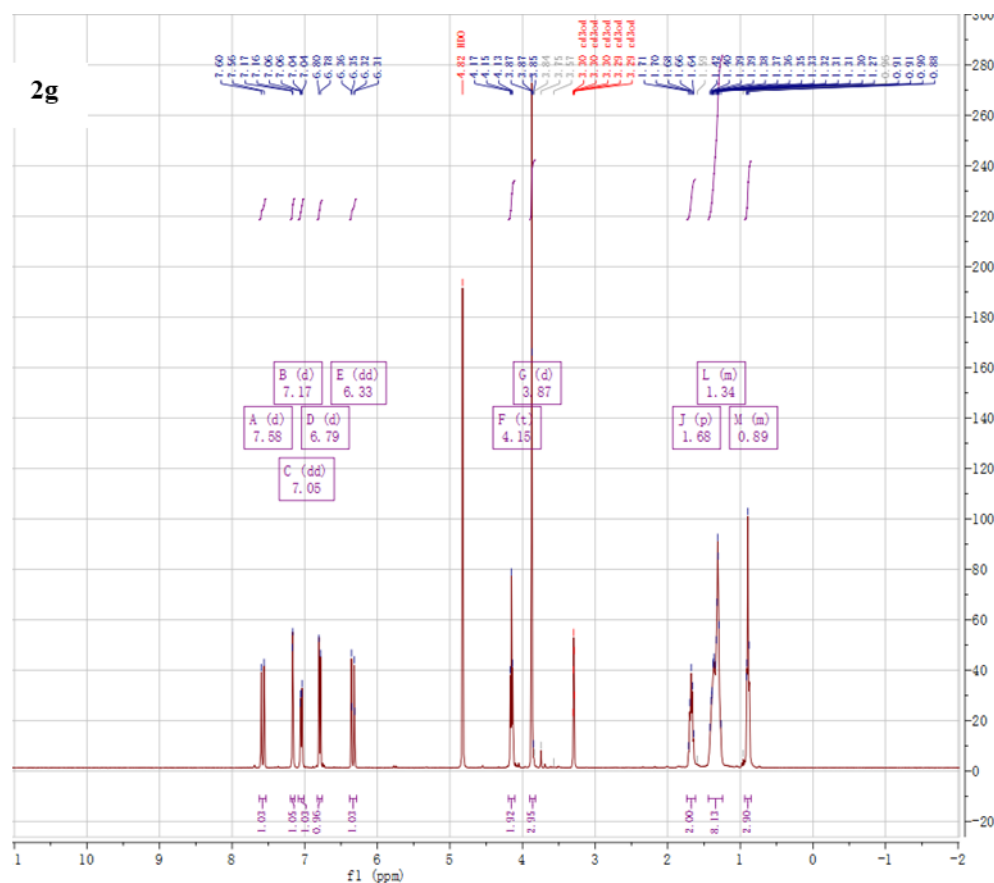

**Figure S2.**  $^1\text{H}$  NMR spectrum of ferulate esters. **2a:** Ethyl ferulate, **2b** Propyl ferulate, **2c:** Isopropyl ferulate, **2d:** Butyl ferulate, **2e:** Chlorobutyl ferulate, **2f:** Amyl ferulate, **2g:** Heptyl ferulate.

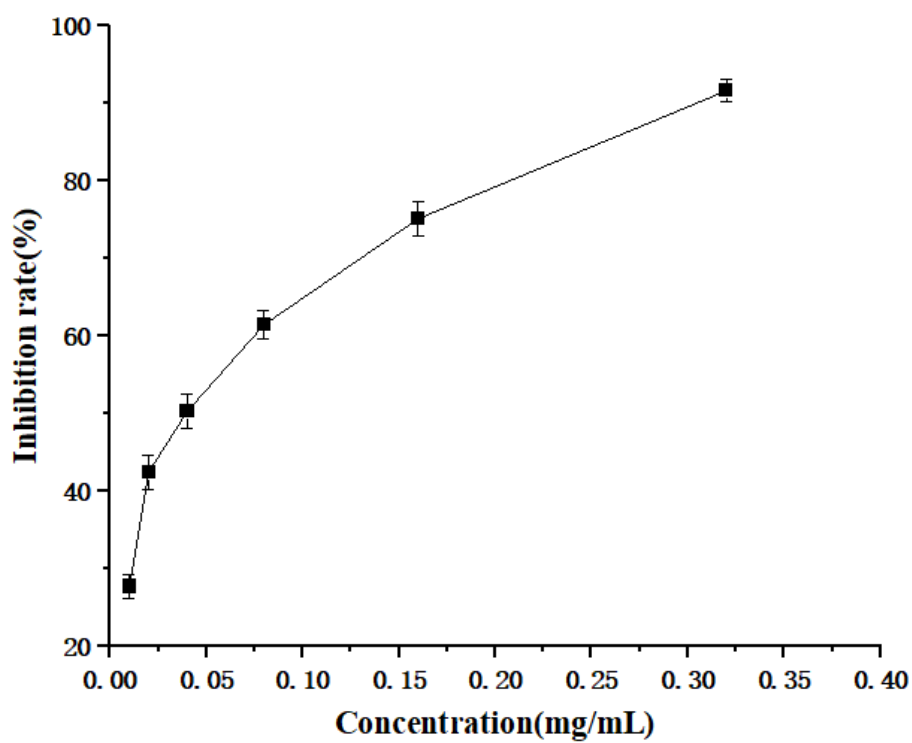

**Figure S3.** Antimicrobial activity of 2e-EO<sub>1</sub> against *R. solanacearum*. Ethanol was used as CK. The state time of incubation was 24 h and the detection wavelength was 600 nm. The EC<sub>50</sub> value was fitted by Logistic evaluation.
